# Supplementary material for: Loss of chromosome Y in blood, but not in brain, of suicide completers
Source: PubMed Central journal article supplement (PMC5754120; doi:10.1371/journal.pone.0190667), 2018-01-04
Supplement: pone.0190667.s001.pdf [file pone.0190667.s001.pdf]

**S1 Table. Primer sequences and polymerase chain reaction conditions.**

| Locus               | Primers (5'-3')                                                                                  |
|---------------------|--------------------------------------------------------------------------------------------------|
| <i>AMELY</i>        | F: CCCTGGGCTCTGTAAAGAATAGTG                                                                      |
| <i>AMELX</i>        | R: ATCAGAGCTTAAACTGGGAAGCTG                                                                      |
|                     | 95 °C for 5 min followed by 28 cycles of 95 °C for 1 min, 58 °C for 1 min, and 72 °C for 1.5 min |
| <i>TAF9B</i>        | F: TTTGACAGGTAGTTTTGGGTCA                                                                        |
| Homologous sequence | R: TGGTTTTGCCTAGGTCCAGT                                                                          |
|                     | 95 °C for 5 min followed by 28 cycles of 95 °C for 1 min, 58 °C for 1 min, and 72 °C for 1.5 min |
| <i>MYPT2</i>        | F: CTCACTACATGACATTCAGG                                                                          |
| Homologous sequence | R: GTTTCTTCCCAGTATCTAGTACAGTGC                                                                   |
|                     | 95 °C for 5 min followed by 28 cycles of 95 °C for 1 min, 58 °C for 1 min, and 72 °C for 1.5 min |

Abbreviations: *AMELY*, amelogenin, Y-linked; *AMELX*, amelogenin, X-linked; *TAF9B*, TATA-box binding protein associated factor 9b; *MYPT2*, myosin phosphatase target subunit 2;

min, minutes.
