# Supplementary material for: Loss of chromosome Y in blood, but not in brain, of suicide completers
Source: PubMed Central journal article supplement (PMC5754120; doi:10.1371/journal.pone.0190667), 2018-01-04
Supplement: pone.0190667.s002.pdf [file pone.0190667.s002.pdf]

**S2 Table. Genotype and allele frequencies of the LOY-associated SNPs in our blood samples.**

| SNP ID <sup>a</sup> | Phen <sup>b</sup> | Genotype distribution |     |    | Minor allele |        | p-value <sup>c</sup> |          |         | Power <sup>d</sup> | OR<br>(95% CI) | MAF<br>in JPT <sup>a</sup> | Nearest gene <sup>a</sup> | GWAS p-value<br>in previous studies <sup>e</sup> |
|---------------------|-------------------|-----------------------|-----|----|--------------|--------|----------------------|----------|---------|--------------------|----------------|----------------------------|---------------------------|--------------------------------------------------|
|                     |                   | MM                    | Mm  | mm | MAF          | Allele | HWE                  | Genotype | Allele  |                    |                |                            |                           |                                                  |
| rs13191948          | Case              | 15                    | 6   | 0  | 0.143        | T      | 1.000                | 0.288    | 0.261   | 0.172              | 1.69           | 0.077                      | <i>CCDC162P</i>           | $2.20 \times 10^{-19}$                           |
| Chr6: 109634599     | Con               | 201                   | 33  | 5  | 0.090        |        | 0.057                |          | (0.797) |                    | (0.67-4.23)    |                            |                           |                                                  |
| rs4721217           | Case              | 10                    | 9   | 2  | 0.310        | T      | 1.000                | 0.105    | 0.098   | 0.198              | 0.57           | 0.404                      | <i>MAD1L1</i>             | $3.50 \times 10^{-14}$                           |
| Chr7: 1973579       | Con               | 77                    | 113 | 49 | 0.441        |        | 0.590                |          | (0.398) |                    | (0.29-1.12)    |                            |                           |                                                  |
| rs2887399           | Case              | 18                    | 3   | 0  | 0.071        | T      | 1.000                | 0.912    | 0.912   | 0.056              | 1.07           | 0.029                      | <i>TCL1A</i>              | $1.37 \times 10^{-10}$                           |
| Chr14: 96180695     | Con               | 207                   | 32  | 0  | 0.067        |        | 0.658                |          | (1.000) |                    | (0.31-3.66)    |                            |                           |                                                  |
| rs12448368          | Case              | 11                    | 7   | 3  | 0.310        | C      | 0.525                | 0.028    | 0.019   | 0.405              | 2.26           | 0.212                      | <i>CENPN</i>              | $7.10 \times 10^{-11}$                           |
| Chr16: 81044947     | Con               | 171                   | 57  | 11 | 0.165        |        | 0.067                |          | (0.078) |                    | (1.12-4.55)    |                            |                           |                                                  |
| rs11082396          | Case              | 14                    | 6   | 1  | 0.190        | C      | 1.000                | 0.097    | 0.124   | 0.190              | 0.54           | 0.250                      | <i>SETBP1</i>             | $1.20 \times 10^{-10}$                           |
| Chr18: 42080720     | Con               | 108                   | 117 | 14 | 0.303        |        | 0.021                |          | (0.508) |                    | (0.24-1.20)    |                            |                           |                                                  |

Abbreviations: SNP ID, single nucleotide polymorphism identification; Phen, phenotype; M, major allele; m, minor allele; MAF, minor allele frequency; HWE, Hardy-Weinberg equilibrium; OR, odds ratio; CI, confidence interval; GWAS, genome-wide association study; Con, control; *CCDC162P*, coiled-coil domain containing 162, Pseudogene; *MAD1L1*, mitotic spindle assembly checkpoint protein MAD1; *TCL1A*, T-cell leukemia/lymphoma 1A; *CENPN*, centromere protein N; *SETBP1*, SET binding protein 1.

<sup>a</sup> SNP ID number, positions, MAF in Japanese (JPT) populations and nearest gene are available at The 1000 Genomes Project (phase 3) (<http://phase3browser.1000genomes.org/index.html>).

<sup>b</sup> Case means our subjects with loss of chromosome Y (LOY) (n = 21). Con means our subjects without LOY (n = 239).

<sup>c</sup> Genotypic p values were tested with Cochran-Armitage test for trend. Allelic p values were tested with Chi square; corrections for multiple comparisons are in parentheses (for 10,000 permutations).

<sup>d</sup> The power analysis was performed with the PS v2.1.3.1 program.

<sup>e</sup> p-value of rs2887399 was from the GWAS by Zhou et al. [15] and p-values of other SNPs were from the GWAS by Wright et al. [16].
