# Supplementary material for: Loss of chromosome Y in blood, but not in brain, of suicide completers
Source: PubMed Central journal article supplement (PMC5754120; doi:10.1371/journal.pone.0190667), 2018-01-04
Supplement: pone.0190667.s003.pdf [file pone.0190667.s003.pdf]

**S3 Table. Multiple logistic regression analysis of LOY in peripheral blood of suicide completers and controls with the LOY-associated SNPs as covariates.**

| All samples (n =260)            | LOY (Y/X ratio < 0.9) |                |                 |                     |
|---------------------------------|-----------------------|----------------|-----------------|---------------------|
|                                 | B <sup>a</sup>        | p <sup>a</sup> | OR <sup>a</sup> | 95% CI <sup>a</sup> |
| Phenotype (Suicide vs. Control) | 1.12                  | <b>0.043</b>   | 3.05            | 1.04-8.99           |
| Age (years)                     | 0.06                  | <b>0.001</b>   | 1.06            | 1.02-1.10           |
| rs13191948 (MM/Mm/mm)           | 0.48                  | 0.331          | 1.61            | 0.62-4.24           |
| rs4721217 (MM/Mm/mm)            | -0.57                 | 0.135          | 0.57            | 0.27-1.19           |
| rs2887399 (MM/Mm/mm)            | -0.10                 | 0.890          | 0.91            | 0.23-3.56           |
| rs12448368 (MM/Mm/mm)           | 0.53                  | 0.143          | 1.69            | 0.84-3.42           |
| rs11082396 (MM/Mm/mm)           | -0.70                 | 0.153          | 0.50            | 0.19-1.30           |

Abbreviations: LOY, loss of chromosome Y; OR, odds ratio; CI, confidence interval; M, major allele; m, minor allele.

<sup>a</sup>Statistical values were derived from multiple logistic regression analysis adjusted for phenotype (Suicide vs. Control), age, and the genotype of the five SNPs. B represents the unstandardized partial regression coefficient. p-values shown in bold are significant at < 0.05.
